# Supplementary material
Source: Springer Nature journal article supplement (https://www.springermedizin.de/resource/supplementary/12876_2012_791_MOESM4_ESM.pdf/9437482)
Supplement: MOESM4 [file 9437482]

Table 4 The adjusted odds ratios of metabolic risk factors for NAFLD

| Variable(s) | Male    |      |       |                 | Female  |      |       |                 |
|-------------|---------|------|-------|-----------------|---------|------|-------|-----------------|
|             | $\beta$ | S.E. | OR    | <i>P</i> -value | $\beta$ | S.E. | OR    | <i>P</i> -value |
| BMI         | 1.195   | .014 | 3.304 | .000            | 1.336   | .023 | 3.806 | .000            |
| WC          | .673    | .014 | 1.960 | .000            | 1.046   | .022 | 2.846 | .000            |
| BP          | .667    | .011 | 1.949 | .000            | 0.719   | .017 | 2.053 | .000            |
| FPG         | .407    | .015 | 1.502 | .000            | 0.899   | .024 | 2.458 | .000            |
| TG          | 1.337   | .012 | 3.809 | .000            | 1.218   | .020 | 3.381 | .000            |
| HDL         | .468    | .021 | 1.596 | .000            | 0.588   | .024 | 1.801 | .000            |
| normal      | -6.239  | .036 | 0.002 | .000            | -8.096  | .048 | 0.000 | .000            |

$\beta$  :Beta coefficient; S.E: Standard error; OR: odds ratio; BMI: Body mass index,  $\geq 25\text{kg/m}^2$ ; WC: waist circumference,  $\geq 90\text{cm}$ (male),  $\geq 80\text{cm}$ (female);

BP: blood pressure,  $\geq 130/85\text{mmHg}$  Or hypertension (HBP); FPG: Fasting blood glucose,  $\geq 5.6\text{ mmol/L}$  Or type 2 diabetes (2-DM);

TG: Triglycerides,  $\geq 1.7\text{mmol/L}$ ; HDL: High Density Lipoprotein,  $\leq 1.03\text{mmol/L}$ , (male)  $< 1.29\text{mmol/L}$  (female).
